# Supplementary material for: TGF β Receptor 1: An Immune Susceptibility Gene in HPV-Associated Cancer
Source: Oxford University Press journal article supplement (doi:10.1158/0008-5472.can-14-0602-t), 2014-10-02
Supplement: 00085472can140602t-sup-127786_1_supp_2469489_n5hp8j.docx [file 00085472can140602t-sup-127786_1_supp_2469489_n5hp8j.docx]

| HNC Subsite | Normalized AVG E6 |
| --- | --- |
| Oral Cavity (OC) | 5.88 |
| Oropharynx | 142.89 |
| Hypopharynx | 0.99 |
| OC & Hypopharynx | 5.41 |
| OC and Oropharynx | 0.01 |
| Larynx | 13.97 |
| Esophagus | 4.91 |
| OC & Pharynx & Larynx | 1.98 |
| Hypopharynx & Larynx | 0.02 |

Supplementary Table S1: **Normalized Average E6 Seroreactivity in HNC Subsites**
