# Supplementary figures and images for: TGF β Receptor 1: An Immune Susceptibility Gene in HPV-Associated Cancer
Source: Oxford University Press journal article supplement (doi:10.1158/0008-5472.can-14-0602-t), 2014-10-02

Supplementary Table S4: **PPI analysis p-values determined using DAPPLE**


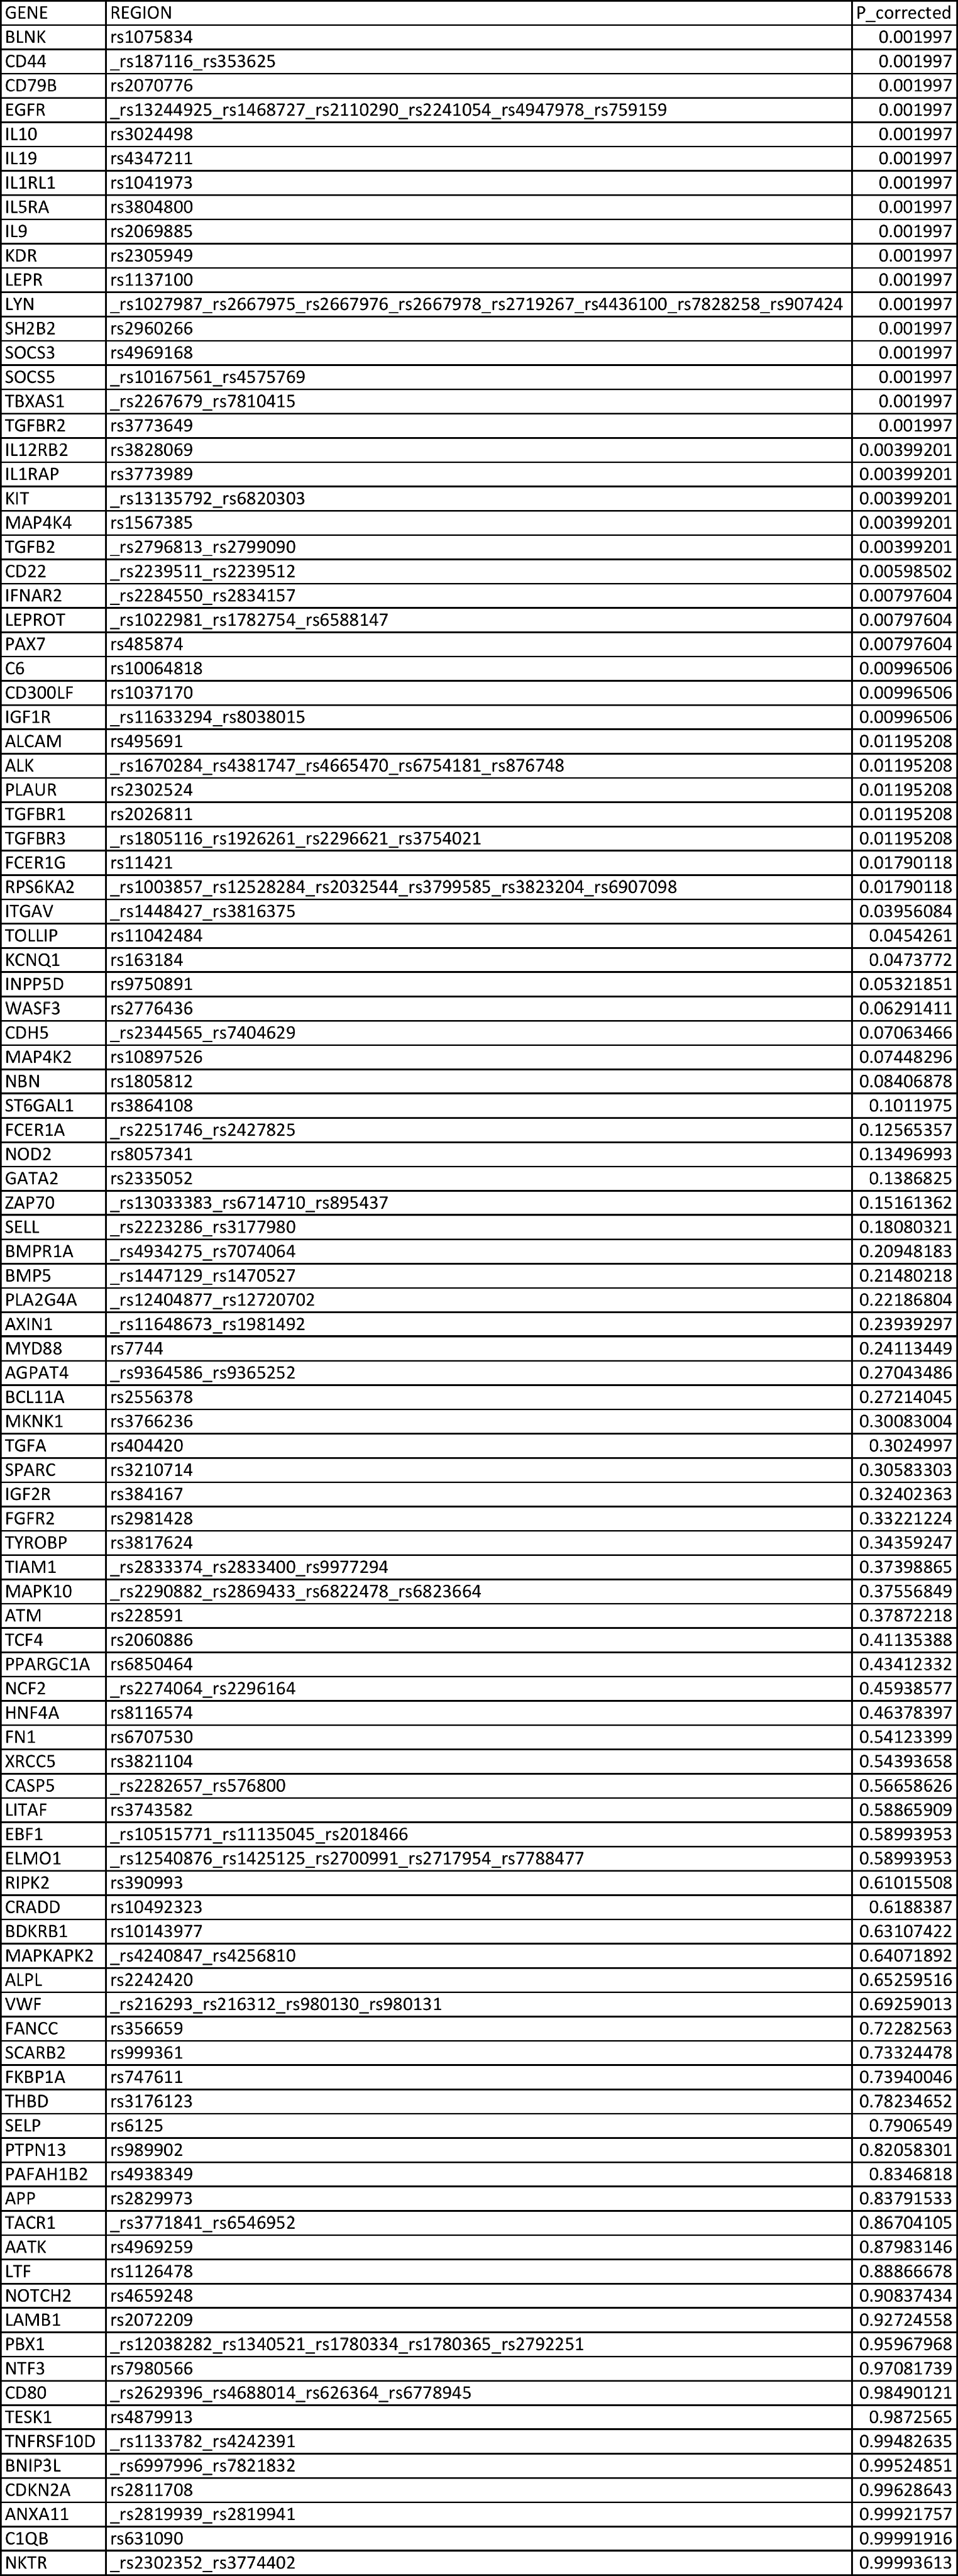

Supplement: 00085472can140602t-sup-127786_1_supp_2469490_n5hp8j.docx [file 00085472can140602t-sup-127786_1_supp_2469490_n5hp8j.docx]
